# Supplementary material for: Tracking Children’s Mental Health in the 21st Century: Lessons from the 2014 OCHS
Source: PubMed Central journal article supplement — Can J Psychiatry. 2019 Apr 12;64(4):232–6. doi: 10.1177/0706743719830025 (PMC6463360; doi:10.1177/0706743719830025), 2019-04-12
Supplement: ExampleQuestionnaire.pdf [file ExampleQuestionnaire.pdf]

# PARENT/CAREGIVER QUESTIONNAIRE

## (OF YOUTH AGE 4 TO 17)

### *Instructions*

Below are some questions about how your child is doing. Please put an 'X' in the box next to your response. Leave the question blank if you prefer not to answer it.

The statements below describe some of the feelings and behaviours of children/youth. For each statement, please select the response that best describes this child/youth now or within the past 6 months.

|                                                             | Never<br>or<br>not<br>true | Sometimes<br>or<br>somewhat<br>true | Often<br>or<br>very<br>true |                                     | Never<br>or<br>not<br>true | Sometimes<br>or<br>somewhat<br>true | Often<br>or<br>very<br>true |
|-------------------------------------------------------------|----------------------------|-------------------------------------|-----------------------------|-------------------------------------|----------------------------|-------------------------------------|-----------------------------|
| Angry and resentful                                         | <input type="checkbox"/>   | <input type="checkbox"/>            | <input type="checkbox"/>    | Finds it hard to stop worrying      | <input type="checkbox"/>   | <input type="checkbox"/>            | <input type="checkbox"/>    |
| Anxious or on edge                                          | <input type="checkbox"/>   | <input type="checkbox"/>            | <input type="checkbox"/>    | Gets back at people                 | <input type="checkbox"/>   | <input type="checkbox"/>            | <input type="checkbox"/>    |
| Argues a lot with adults                                    | <input type="checkbox"/>   | <input type="checkbox"/>            | <input type="checkbox"/>    | Gets in many fights                 | <input type="checkbox"/>   | <input type="checkbox"/>            | <input type="checkbox"/>    |
| Can't concentrate, can't pay attention for long             | <input type="checkbox"/>   | <input type="checkbox"/>            | <input type="checkbox"/>    | Has been physically cruel to others | <input type="checkbox"/>   | <input type="checkbox"/>            | <input type="checkbox"/>    |
| Can't stay seated when required to do so                    | <input type="checkbox"/>   | <input type="checkbox"/>            | <input type="checkbox"/>    | Has trouble enjoying self           | <input type="checkbox"/>   | <input type="checkbox"/>            | <input type="checkbox"/>    |
| Cruelty, bullying or meanness to others                     | <input type="checkbox"/>   | <input type="checkbox"/>            | <input type="checkbox"/>    | Impulsive or acts without thinking  | <input type="checkbox"/>   | <input type="checkbox"/>            | <input type="checkbox"/>    |
| Destroys things belonging to their family or other children | <input type="checkbox"/>   | <input type="checkbox"/>            | <input type="checkbox"/>    | Loses temper                        | <input type="checkbox"/>   | <input type="checkbox"/>            | <input type="checkbox"/>    |
| Distractible, has trouble sticking to any activity          | <input type="checkbox"/>   | <input type="checkbox"/>            | <input type="checkbox"/>    | Nervous, high-strung or tense       | <input type="checkbox"/>   | <input type="checkbox"/>            | <input type="checkbox"/>    |
| Easily annoyed by others                                    | <input type="checkbox"/>   | <input type="checkbox"/>            | <input type="checkbox"/>    | Runs away from home                 | <input type="checkbox"/>   | <input type="checkbox"/>            | <input type="checkbox"/>    |
| Fails to finish things they start                           | <input type="checkbox"/>   | <input type="checkbox"/>            | <input type="checkbox"/>    | Talks about killing self            | <input type="checkbox"/>   | <input type="checkbox"/>            | <input type="checkbox"/>    |
| Feels worthless or inferior                                 | <input type="checkbox"/>   | <input type="checkbox"/>            | <input type="checkbox"/>    | Too fearful or anxious              | <input type="checkbox"/>   | <input type="checkbox"/>            | <input type="checkbox"/>    |
| Fidgets                                                     | <input type="checkbox"/>   | <input type="checkbox"/>            | <input type="checkbox"/>    |                                     |                            |                                     |                             |

**In the past 6 months do you think this child/youth needed professional help for emotional or behavioural problems?**

No       Yes

The items are scored as follow: Never or not true=0, Sometimes or somewhat true=1, Often or very true=2.

**Internalizing, Externalizing and Attention domains scores:** Scale scores can be generated by summing together the following sets of items.

**Total scale score:** All 23 items can be summed to together to generate a total score.

Internalizing (7 items)

Finds it hard to stop worrying  
Anxious or on edge  
Has trouble enjoying self  
Nervous, high-strung or tense  
Talks about killing self  
Feels worthless or inferior  
Too fearful or anxious

Externalizing (10 items)

Angry and resentful  
Gets back at people  
Argues a lot with adults  
Gets in many fights  
Has been physically cruel to others  
Cruelty, bullying or meanness to others  
Destroys things belonging to their family or other children  
Loses temper  
Easily annoyed by others  
Runs away from home

Attention problems (6 items)

Can't concentrate, can't pay attention for long  
Can't stay seated when required to do so  
Impulsive or acts without thinking  
Distractible, has trouble sticking to any activity  
Fails to finish things they start  
Fidgets
